# Supplementary material for: Fabrication of a composite material of Gd2O3, Co3O4 and graphene on nickel foam for high-stability supercapacitors
Source: Royal Society of Chemistry journal article supplement (doi:10.1039/d2nj02188a), 2022-01-01
Supplement: d2nj02188a1.pdf [file d2nj02188a1.pdf]

## Supporting Information

### Fabrication of composite material of Gd<sub>2</sub>O<sub>3</sub>, Co<sub>3</sub>O<sub>4</sub> and graphene on nickel foam for high-stability supercapacitor

Shasha Wang,<sup>a</sup> Shixiang Lu,<sup>\*a</sup> Wenguo Xu,<sup>\*a</sup> Shuguang Li,<sup>a</sup> Jingjing Meng,<sup>a</sup> and Yulin Xin<sup>a</sup>

---

<sup>a</sup>School of Chemistry and Chemical Engineering, Beijing Institute of Technology, Beijing 100081, China

<sup>\*</sup>Corresponding author, E-mail: [shixianglu@bit.edu.cn](mailto:shixianglu@bit.edu.cn) (Shixiang Lu); [xuwg60@bit.edu.cn](mailto:xuwg60@bit.edu.cn) (Wenguo Xu)

#### S1 Preparation of Gd<sub>2</sub>O<sub>3</sub>/Co<sub>3</sub>O<sub>4</sub>/NF composite electrode

0.8 mmol (0.232 g) Co(NO<sub>3</sub>)<sub>2</sub>·6H<sub>2</sub>O, 0.8 mmol (0.361 g) Gd(NO<sub>3</sub>)<sub>3</sub>·6H<sub>2</sub>O and 1 mmol (0.060 g) urea were dissolved in 15 mL of deionised water and stirred magnetically for 40 min to form a homogeneous solution. A portion of the above-treated NF and mixed solution was transferred to an autoclave lined with polytetrafluoroethylene and reacted for 12 h in an oven at 180 °C. After being washed with ethanol and deionized water, the Gd<sub>2</sub>O<sub>3</sub>/Co<sub>3</sub>O<sub>4</sub> precursor was dried in an oven at 90 °C for 4 h. After 2 h of annealing in a muffle furnace at 300 °C, the Gd<sub>2</sub>O<sub>3</sub>/Co<sub>3</sub>O<sub>4</sub>/NF composite electrode was produced.

#### S2 Preparation of Gd<sub>2</sub>O<sub>3</sub>/rGO/NF composite electrode

In 7.5 mL of deionized water, 0.8 mmol Gd(NO<sub>3</sub>)<sub>3</sub>·6H<sub>2</sub>O (0.361 g) and 1 mmol (0.060 g) urea were dissolved and magnetically agitated for 40 min to generate a homogenous solution. Then, 7.5 mL of homogenous graphene oxide suspension (2 mg·mL<sup>-1</sup>) was added. Continue magnetic stirring for 40 min to ensure thorough mixing. The processed NF and combined solution were placed in an autoclave with polytetrafluoroethylene and reacted for 12 h in an oven at 180 °C. The precursor was cleaned with ethanol and deionized water before being dried in a 90 °C oven for 4 h. Finally, the Gd<sub>2</sub>O<sub>3</sub>/rGO/NF composite electrode was created by annealing it for 2 h in a muffle furnace at 300 °C.

#### S3 Preparation of Co<sub>3</sub>O<sub>4</sub>/rGO/NF composite electrode

0.8 mmol (0.232 g) Co(NO<sub>3</sub>)<sub>2</sub>·6H<sub>2</sub>O and 1 mmol (0.060 g) urea were diluted in 7.5 mL deionized water and magnetically agitated for 40 min to generate a homogenous solution. Then 7.5 mL of homogenous graphene oxide suspension (2 mg·mL<sup>-1</sup>, ultrasonication for 2 h) was added. Continue magnetic stirring for 40 min to thoroughly combine. A portion of the above-mentioned treated NF and the combined solution were placed to an autoclave with polytetrafluoroethylene and reacted in an oven at 180 °C for 12 h. The precursor was rinsed with ethanol and deionized water before being dried in an oven at 90 °C for 4 h. Finally, the Co<sub>3</sub>O<sub>4</sub>/rGO/NF composite electrode was formed after 2 h of annealing in a muffle furnace at 300 °C.

#### S4 Preparation of rGO/NF composite electrode

Added 7.5 mL of deionized water and 7.5 mL of graphene oxide suspension (2 mg·mL<sup>-1</sup>) to the beaker. Mixed well with magnetic stirring for 40 min. A portion of the above-mentioned treated NF and the combined solution were placed to an autoclave with polytetrafluoroethylene and reacted in an oven at 180 °C for 12 h. The surface of the NF was cleaned with ethanol and deionized water before being dried in a 90 °C oven for 4 h. Finally, the rGO/NF composite electrode was formed after 2 h of annealing in a muffle furnace at 300 °C.

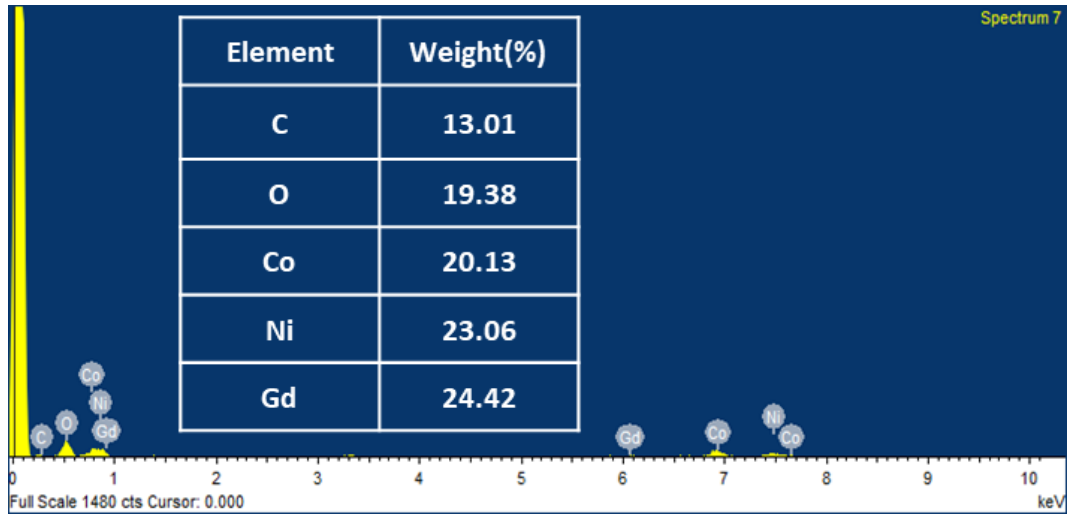

Fig. S5 EDS of Gd<sub>2</sub>O<sub>3</sub>/Co<sub>3</sub>O<sub>4</sub>/rGO/NF.

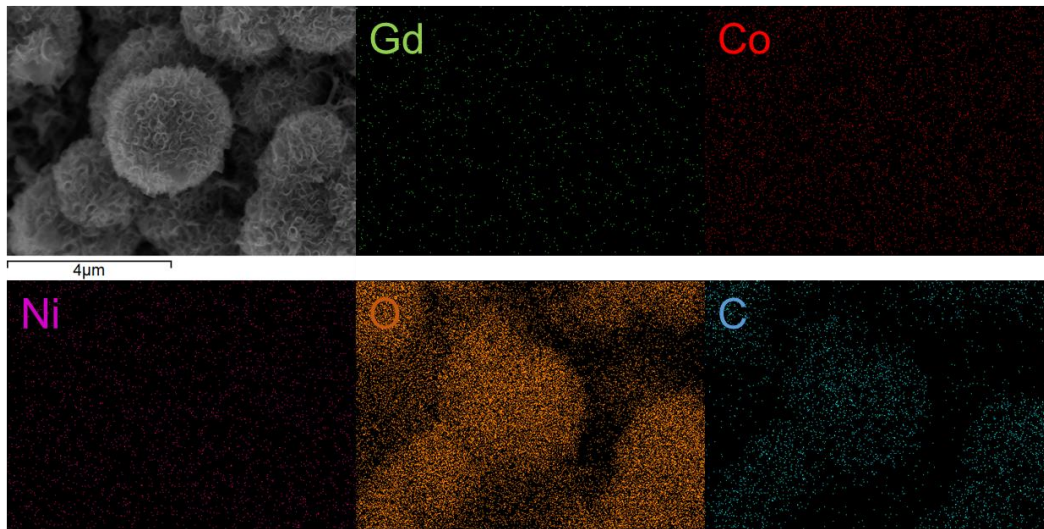

Fig. S6 EDS elemental mapping images of the composite (Gd, Co, Ni, O and C).

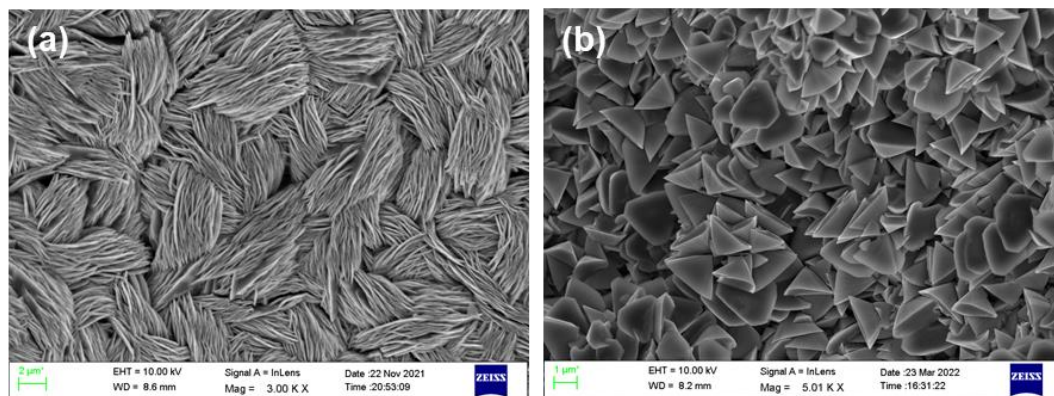

Fig. S7 SEM images of (a) Gd<sub>2</sub>O<sub>3</sub>/ NF, (b) Co<sub>3</sub>O<sub>4</sub>/ NF.

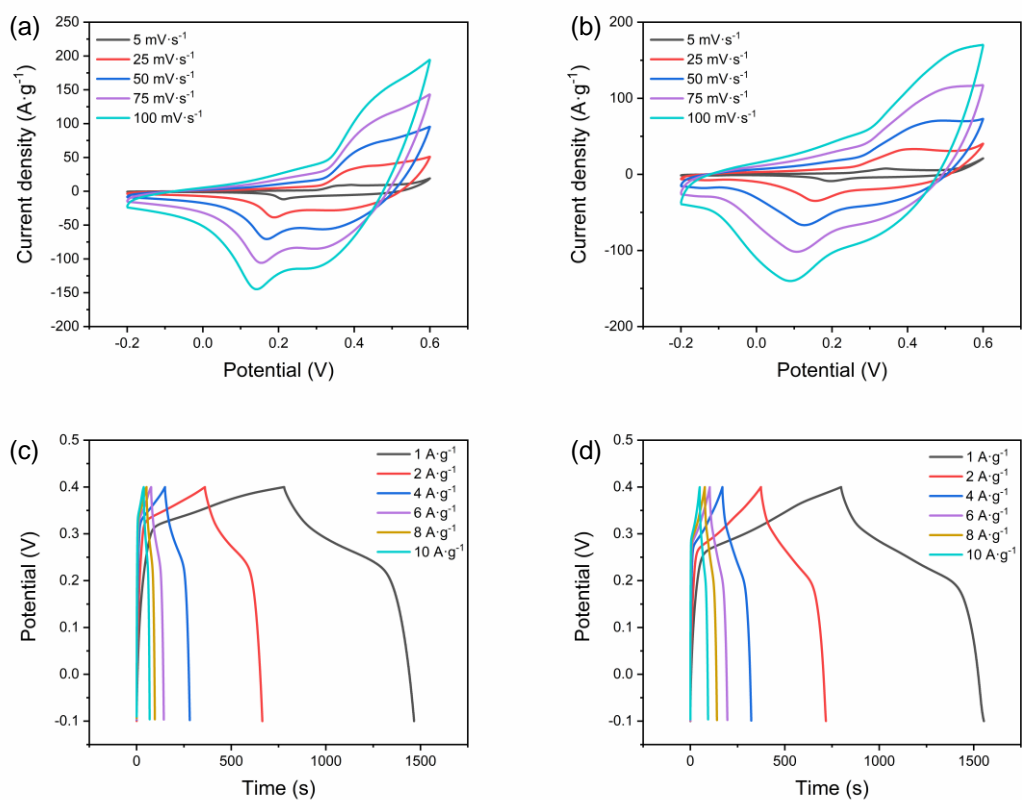

**Fig. S8** (a, b) CV curves of Gd<sub>2</sub>O<sub>3</sub>/rGO/NF and Co<sub>3</sub>O<sub>4</sub>/rGO/NF electrodes under different scan rates; (c, d) GCD curves of Gd<sub>2</sub>O<sub>3</sub>/rGO/NF and Co<sub>3</sub>O<sub>4</sub>/rGO/NF electrodes at different current densities.
